# Supplementary material
Source: PubMed Central journal article supplement (PMC9805701)
Supplement: NIHMS1857736-supplement-Supplementary_Material.pdf [file NIHMS1857736-supplement-Supplementary_Material.pdf]

Supplementary Materials for  
**Human antibody recognizing a quaternary epitope in the Puumala virus glycoprotein provides broad protection against orthohantaviruses**

Eva Mittler *et al.*

Corresponding author: Tomas Strandin, tomas.strandin@helsinki.fi; Andrew S. Herbert, andrew.s.herbert4.civ@mail.mil; Mattias N. E. Forsell, mattias.forsell@umu.se; Laura M. Walker, laura.walker@adimab.com; Kartik Chandran, kartik.chandran@einsteinmed.edu

*Sci. Transl. Med.* **14**, eab15399 (2022)  
DOI: 10.1126/scitranslmed.ab15399

**The PDF file includes:**

Material and Methods  
Figs. S1 to S11  
Tables S1 and S2

**Other Supplementary Material for this manuscript includes the following:**

Data file S1  
MDAR Reproducibility Checklist

## **SUPPLEMENTARY MATERIAL**

### **SUPPLEMENTARY MATERIAL AND METHODS**

#### **Cell lines**

Chinese hamster ovary (FreeStyle™ CHO-S) cells (Gibco, catalog no. R80007ATCC) were cultured in a humidified 37°C, 5% CO<sub>2</sub> incubator in high-glucose Dulbecco's modified Eagle's medium (DMEM, Life Technologies) supplemented with 10% fetal bovine serum (FBS, Atlanta Biologicals), 1% GlutaMAX, and 1% penicillin-streptomycin (both Life Technologies). Human osteosarcoma U2OS cells (ATCC catalog no. HTB-96) were similarly maintained in modified McCoy's 5A medium (Life Technologies) supplemented with the above-named reagents.

#### **Screening Syrian hamsters for human IgG uptake following antibody treatment**

ELISA plates were coated with sheep anti-human IgG capture antibody at 0.1 µg per well and blocked with Casein buffer (G Biosciences) at 4°C overnight. Coated plates were washed with PBS/0.1% Tween 20 and blocked with Casein buffer for 1 h at room temperature on a shaker. A standard curve for ADI-42898 was generated by 2-fold dilutions from 500 ng/ml to 15.6 ng/ml of mAb in assay buffer (Casein buffer/10% normal hamster serum). Day 8 serum samples were diluted 1:50 in assay buffer. Standards and diluted samples were added to coated and washed wells and incubated at room temperature for 1 h. Antibodies were detected by adding goat anti-human IgG-HRP conjugate for 1 h. Absorbance values were measured using a SpectraMax 5 (Molecular Devices) and standard curves were generated using GraphPad Prism software and nonlinear regression analysis (sigmoidal, 4PL). Absorbance values from samples with unknown human antibody concentrations were applied to the standard curve to determine the concentration of human IgG. Hamsters that were human IgG negative at day 8 were deemed untreated and removed from the dataset.

### **Polyreactivity assay**

Antibody polyreactivity was measured as described previously (39). Briefly, soluble membrane protein and cytosolic protein fractions obtained from CHO cells were biotinylated using NHS-LC-Biotin (Thermo Fisher). Yeast presenting IgGs on their surface were incubated with biotinylated CHO cell preparations on ice. Cells were then washed twice with ice-cold PBSF (PBS containing 0.1% w/v BSA) and incubated with a secondary labelling mix containing ExtrAvidin-R-PE (Sigma-Aldrich catalog no. E4011), anti-human LC-FITC (Southern Biotech catalog no. 2062-02) and propidium iodide for 15 min. The cells were washed twice with PBSF, resuspended and run on a FACSCanto II (BD Biosciences). The mean fluorescence intensity of binding was normalized using control antibodies that display low, medium or high polyreactivity to assess the non-specific binding.

### **Biolayer interferometry binding analysis with sGn and Gn<sup>H</sup>/Gc**

For monovalent apparent dissociation constant ( $K_D$ ) determination, IgG binding to recombinant sGn and Gn<sup>H</sup>/Gc antigen was measured by biolayer interferometry (BLI) using a FortéBio Octet HTX instrument (Molecular Devices). For measurements with PUUV Gn<sup>H</sup>/Gc, the IgGs were captured (response level 0.5-1.5 nm) to anti-human IgG capture (AHC) biosensors (Molecular Devices) and allowed to stand in PBSF for a minimum of 30 min. After a short (60 s) baseline step in PBSF, the IgG-loaded biosensor tips were exposed (180 s, 1000 rpm of orbital shaking) to the test antigen (100 nM in PBSF) and then dipped (180 s, 1000 rpm of orbital shaking) into PBSF to measure any dissociation of the antigen from the biosensor tip surface. For measurements with sGn, biotinylated antigen (100 nM) was bound to streptavidin capture sensors (Molecular Devices). Binding analysis of IgGs (100 nM) in solution to sGn was performed as described for Gn<sup>H</sup>/Gc antigen. Data for which binding responses were 0.1 nm or greater were aligned, inter-step corrected (to the association step) and fit to a 1:1 binding model using the FortéBio Data Analysis Software, version 11.1.

### **Virus attachment assay**

This assay was performed following a previously published protocol (30). In short, rVSV-PUUV-Gn/Gc particles bearing mNG-labeled nucleocapsids were incubated with mAb (25 nM) or serum from PUUV-experienced donors at room temperature for 1 h. These rVSV:mAb complexes were spin-oculated onto prechilled U2OS cells at 1,000 rpm and 4°C for 10 min followed by an incubation on a cooling plate at 6°C for 30 min. Unbound virus was removed by washing with cold PBS. Cells were harvested in PBS, fixed with 4% paraformaldehyde on ice and surface-bound virus was detected by flow cytometry by gating on mNG using an LSRII flow cytometer (BD Biosciences) at the Flow Cytometry Core Facility of the Albert Einstein College of Medicine.

### **Fusion infection assay**

rVSV-PUUV-Gn/Gc or -ANDV-Gn/Gc particles were bound to prechilled HUVECs by centrifugation at 2,500 rpm and 4°C for 1 h. Cells were placed on ice and unbound virus washed away with cold PBS. To establish the ideal pH for PUUV Gn/Gc-mediated fusion at the plasma membrane, PBS was replaced with DMEM-F12 media adjusted to pH values ranging from 4.0 to 7.0. Fusion was initiated by incubating HUVECs at 37°C for 1 min, followed by shifting cells back to 4°C. Further rounds of infection were prevented by the exchange of media supplemented with 20 mM NH<sub>4</sub>Cl, and infected cells were maintained at 37°C for 12 to 14 h post-infection before automated counting of eGFP<sup>+</sup> and mNG<sup>+</sup> cells using a Cytation 5 cell imaging multi-mode reader (BioTek Instruments) and a Cell-Insight CX5 imager (Thermo Fisher Scientific) including onboard software. To evaluate the ability of mAbs to inhibit fusion, rVSV-PUUV-Gn/Gc were pre-incubated with increasing amounts of mAb (0.005 to 5.0 nM) for 1 h at 4°C prior to centrifugation onto HUVECs. Fusion was initiated with an optimal pH of 5.5 and viral infectivity was scored as described above.

## SUPPLEMENTARY FIGURES & TABLES

Fig S1

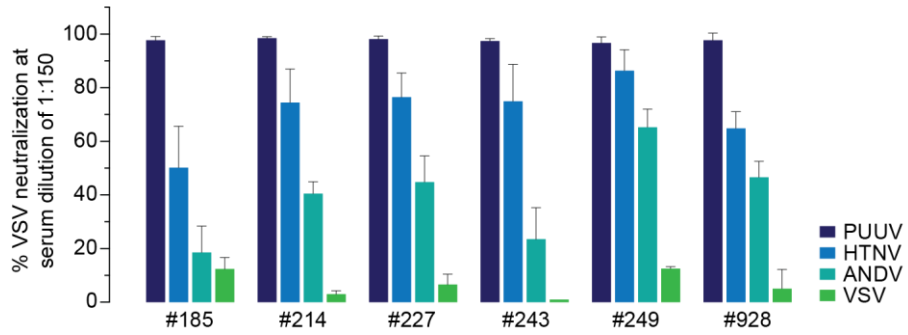

**Fig. S1: Neutralization activity of PUUV convalescent patient sera.**

Neutralization of rVSV-PUUV, -HTNV, and -ANDV-Gn/Gc or -VSV-G infection in the presence of sera from six PUUV-experienced donors (1:150 dilution). Averages  $\pm$  SD,  $n > 4$  from two to three experiments (PUUV and HTNV);  $n = 4$  from two experiments (ANDV);  $n = 2$  from one experiment (VSV).

Fig S2

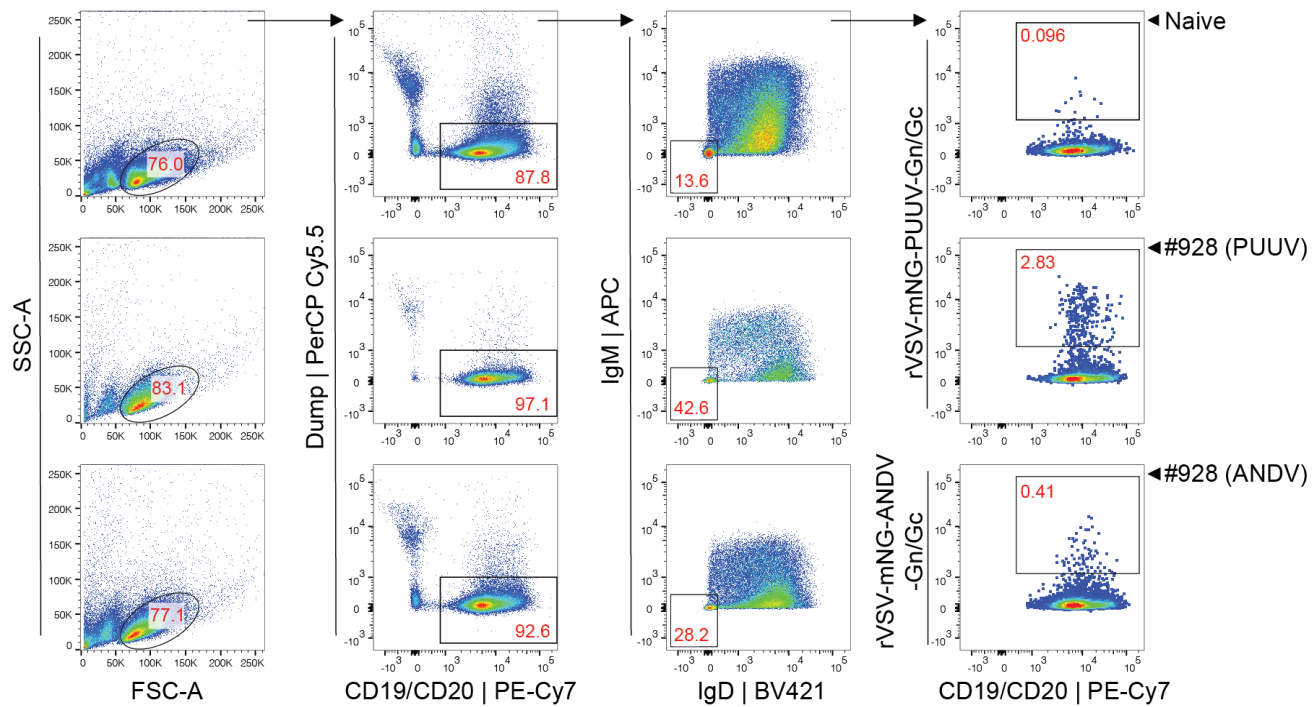

**Fig. S2: Flow gating strategy for isolation of Gn/Gc-reactive memory B cells.**

Representative gating strategy to sort single B cells specific for hantaviral Gn/Gc. SSC-A: Side scattered light; FSC-A: Forward scattered light.

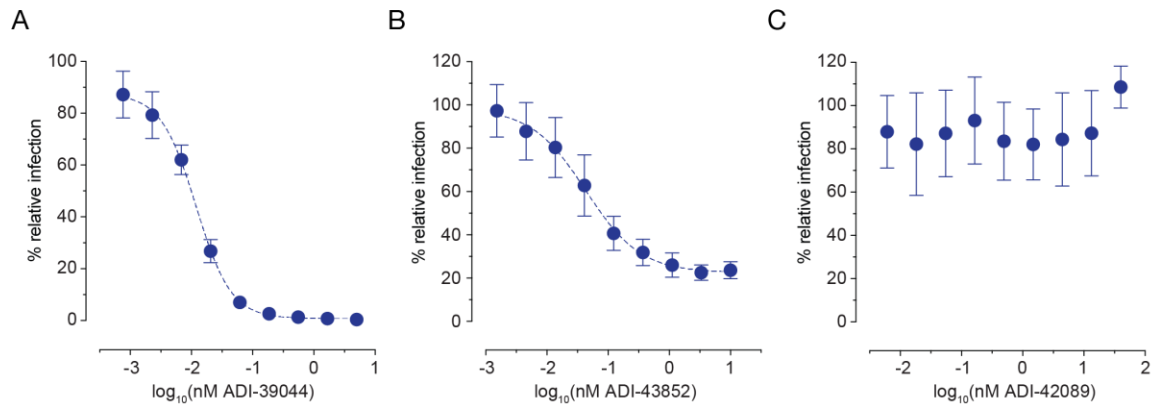

**Fig. S3: Curves for selected mAbs with different neutralization patterns.**

Neutralization of rVSV-HTNV-Gn/Gc by (A) ADI-39044, a neutralizing mAb; (B) ADI-43852, a mAb leaving a non-neutralized virus fraction; (C) ADI-42089, a mAb lacking neutralization activity. Averages  $\pm$  SD,  $n=6$  for two experiments.

Fig S4

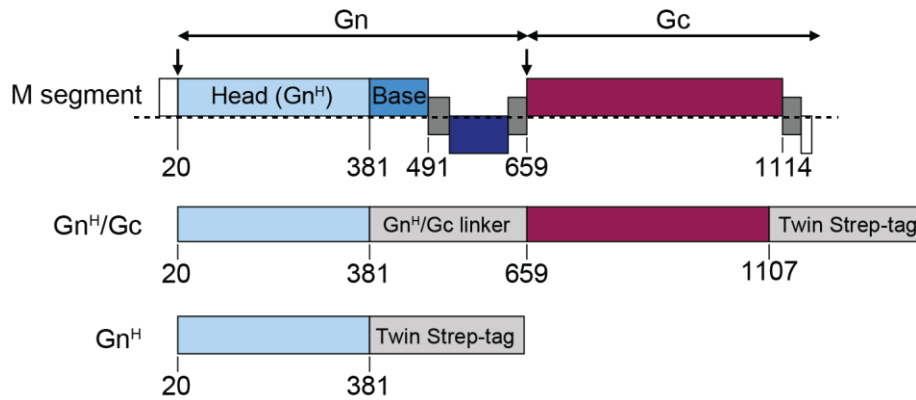

**Fig. S4: Domain organization of PUUV Gn/Gc, Gn<sup>H</sup>/Gc and Gn<sup>H</sup>.**

(*Top*) Diagram of PUUV GPC encoded by a single open reading frame of the genomic RNA segment M. Cleavage sites are marked by arrows. Dashed line indicates the viral membrane. (*Middle*) Schematic of the single-chain Gn<sup>H</sup>/Gc construct spanning the Gn head domain, Gn<sup>H</sup> (aa 20-381) and Gc (aa 659-1107), and bypassing the trans-membrane segments in the precursor polyprotein by a soluble, 43-aa long, flexible linker. A Twin Strep-tag needed for protein purification was encoded in frame at the C-terminal end of the Gc sequence. (*Bottom*) Diagram of the single Gn<sup>H</sup> domain (aa 20-381), also containing a Twin Strep-tag connected to its C-terminus.



A

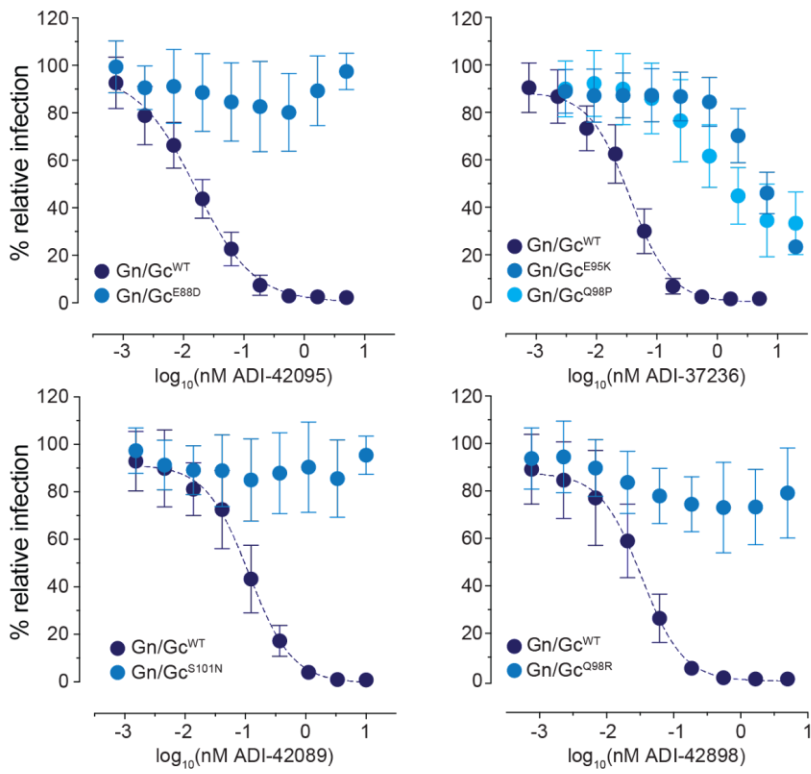

B

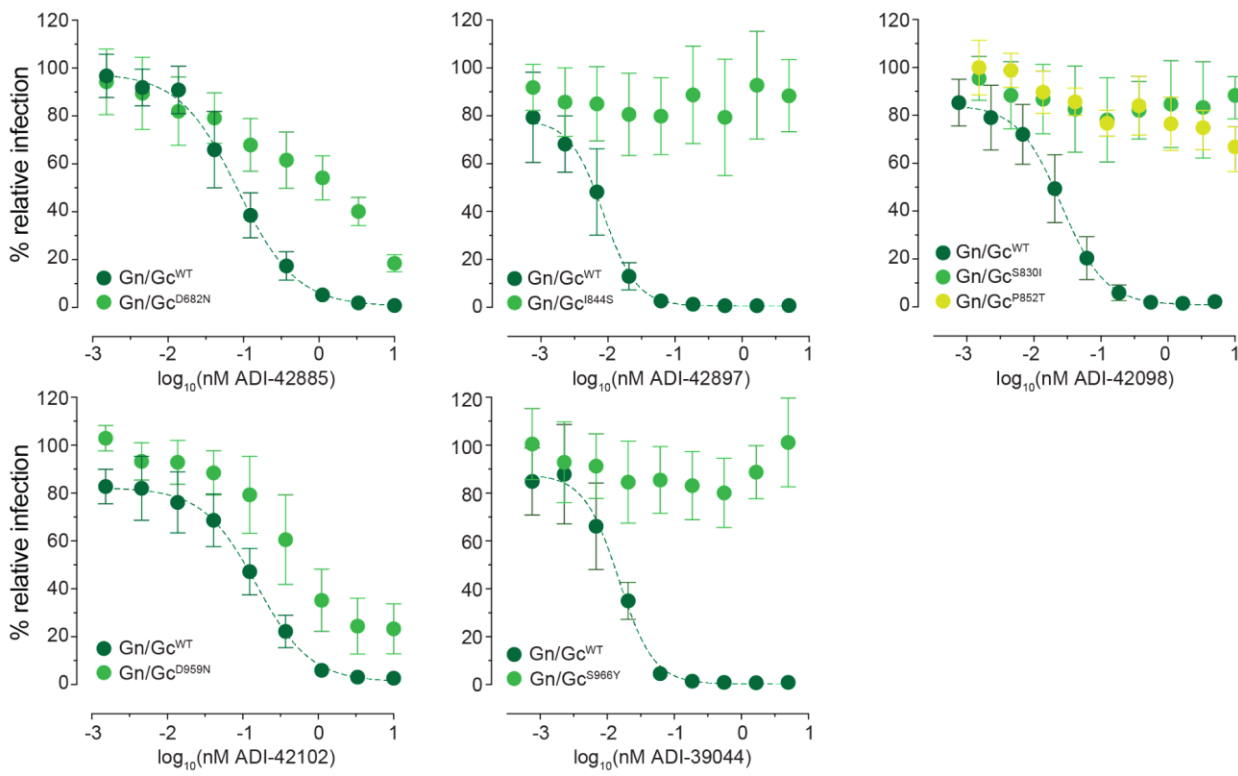

**Fig. S5: Characterization of rVSV-PUUV-Gn/Gc neutralization-escape mutants.**

Capacity of mAbs to neutralize rVSV-PUUV-Gn/Gc bearing neutralization-escape variants in its Gn (**A**) or Gc (**B**) subunit. Averages  $\pm$  SD,  $n=6-12$  from two to four experiments.

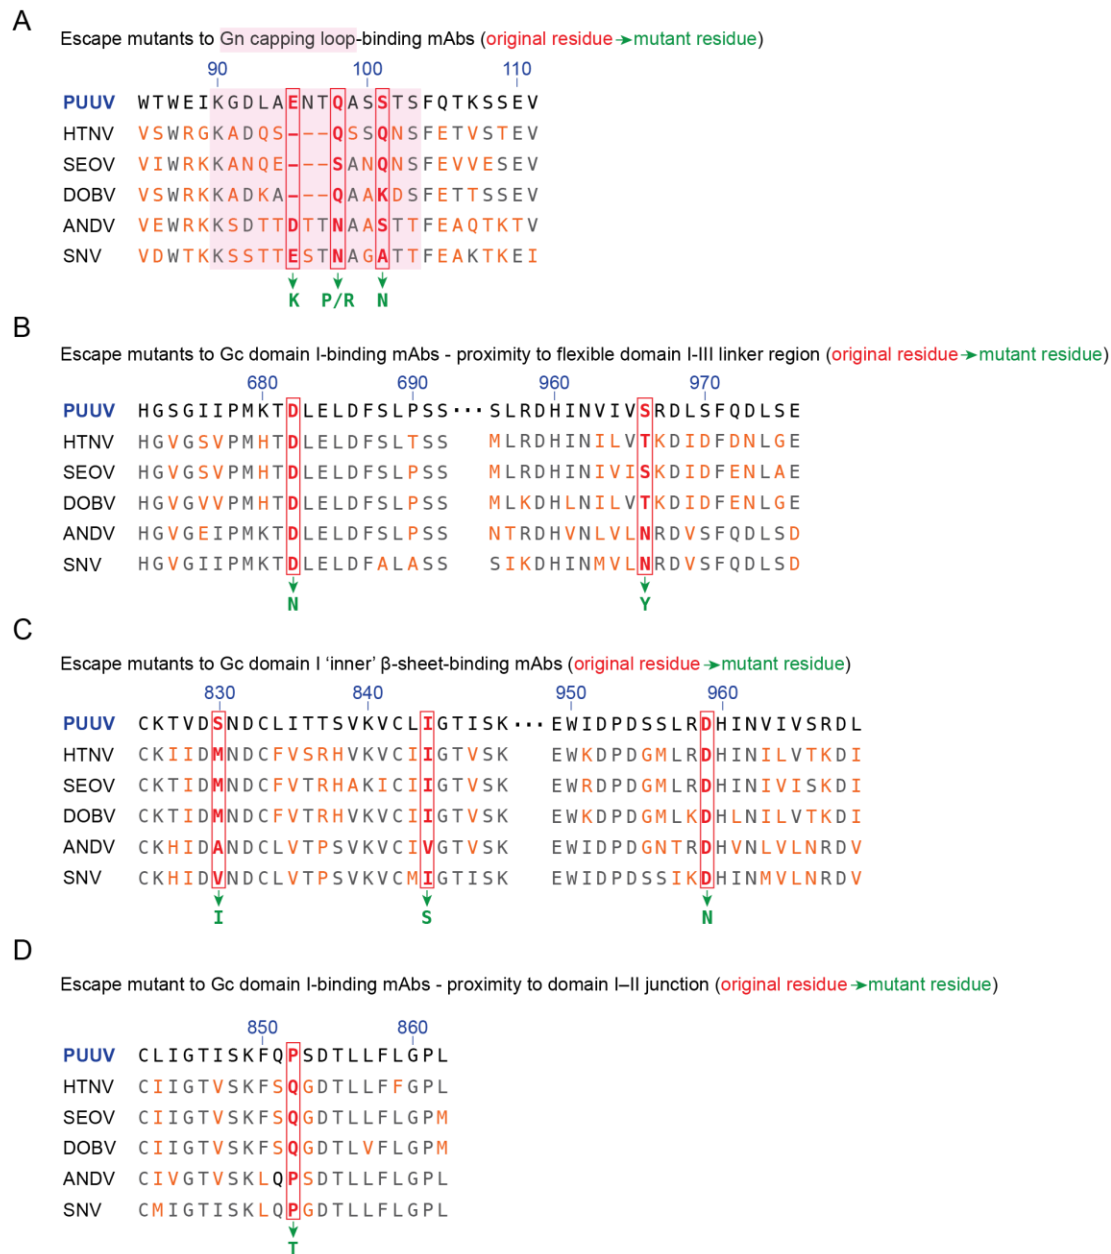

**Fig. S6: Locations of viral neutralization escape mutations in PUUV Gn/Gc.**

Aa sequence alignment of regions of OWH and NWH Gn/Gc encompassing escape mutations are shown (PUUV Gn/Gc numbering). Escape mutations are found in the Gn (A) and Gc (B-D) subunit. Gray, conserved residues. Orange, divergent residues. Positions of escape mutations are boxed and labeled in red, and the residue changes are indicated in green. In (A) the location of the Gn capping loop is shaded in pink.

Fig S7

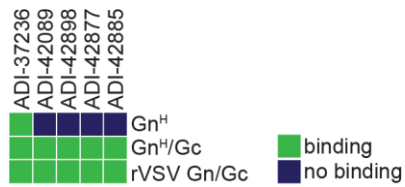

**Fig. S7: Binding activity of mAbs to PUUV Gn/Gc subdomain constructs.**

Heatmap presents binding activity of mAbs to PUUV Gn<sup>H</sup>, Gn<sup>H</sup>/Gc and rVSV-PUUV-Gn/Gc (also see Fig. S4). Binding of mAbs to rVSV-PUUV-Gn/Gc was determined in a single concentration mAb spot ELISA; mAbs crossing an ELISA signal threshold of 0.3 were defined as binders. Binding of mAbs to PUUV Gn<sup>H</sup> and Gn<sup>H</sup>/Gc was determined by BLI; mAbs presenting with binding responses >0.1 nm were defined as binders.

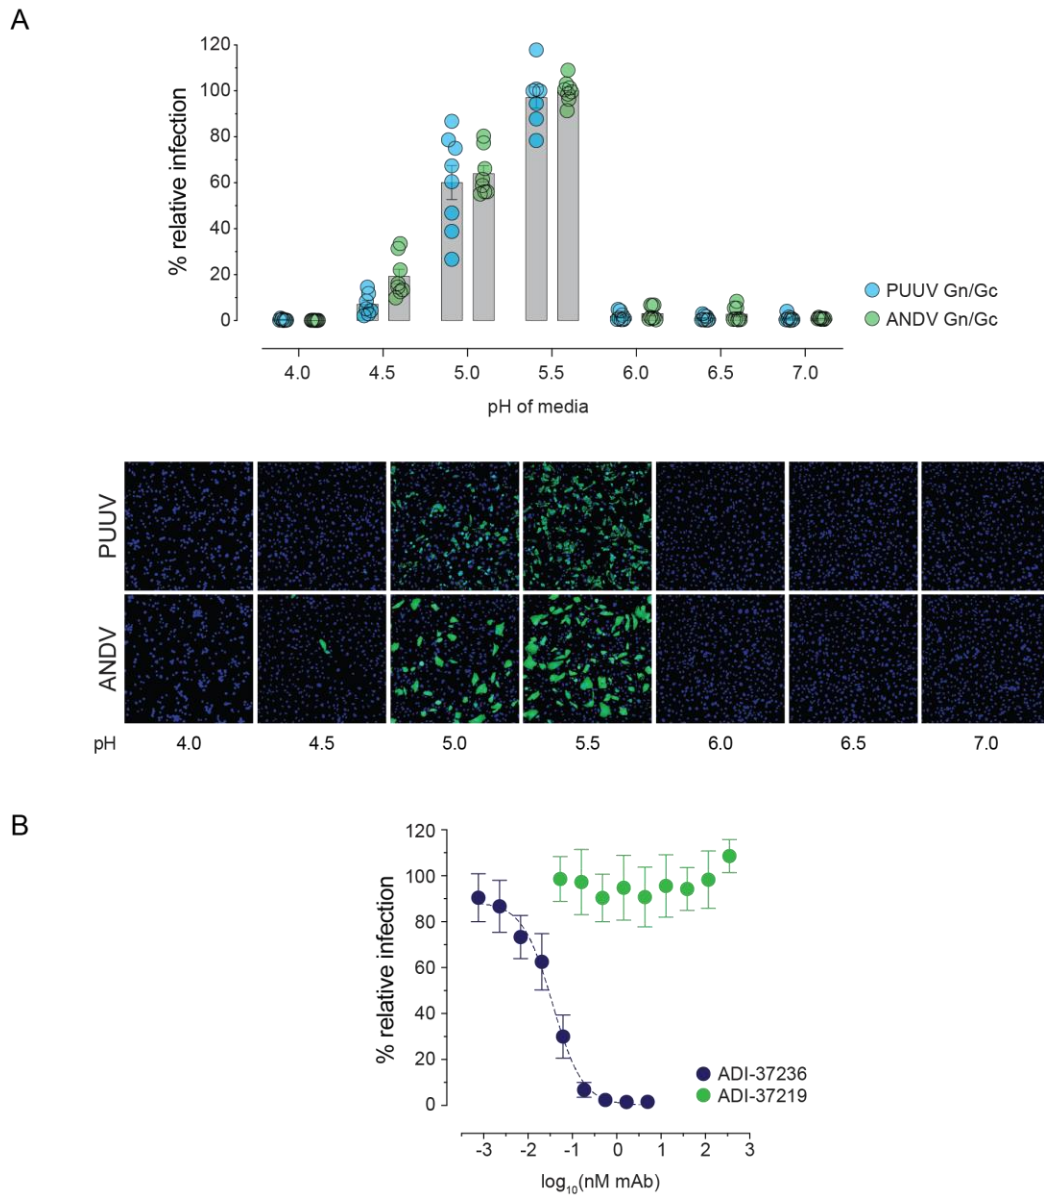

**Fig. S8: Establishment of fusion-infection assay with rVSV-PUUV-Gn/Gc.**

(A) Identification of optimal pH for PUUV Gn/Gc-induced fusion-infection. rVSV particles were bound to pre-chilled HUVECs, incubated with media adjusted to pH 7.0 - 4.0, followed by fusion-infection. rVSV-ANDV-Gn/Gc particles served as positive control. (*Top*) Averages  $\pm$  SD,  $n > 7$  from three experiments. (*Bottom*) Representative images of infected eGFP<sup>+</sup> or mNG<sup>+</sup> cells (pseudo-colored green) detected by fluorescence microscopy. (B) Capacity of ADI-37219 and ADI-37236 to neutralize rVSV-PUUV-Gn/Gc. Averages  $\pm$  SD,  $n = 6$  from two experiments (ADI-37219) and  $n = 9$  from three experiments (ADI-37236).

A

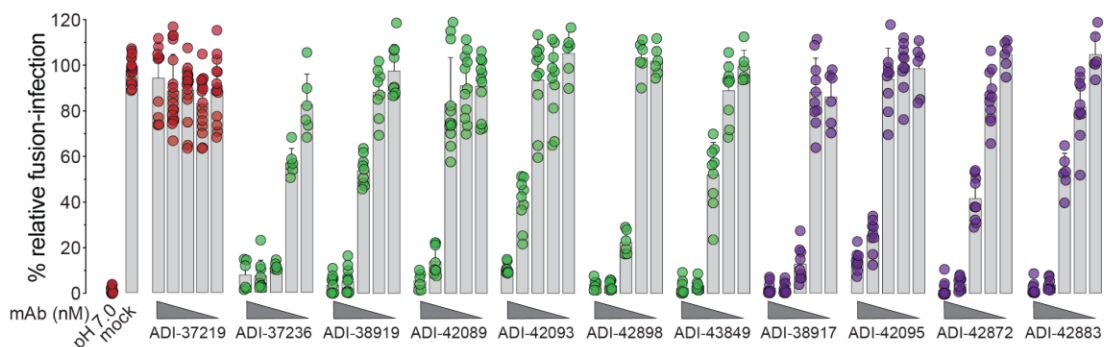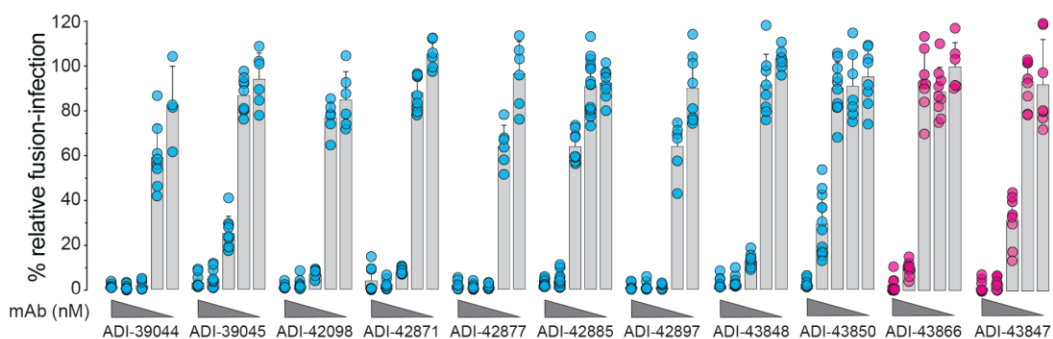

B

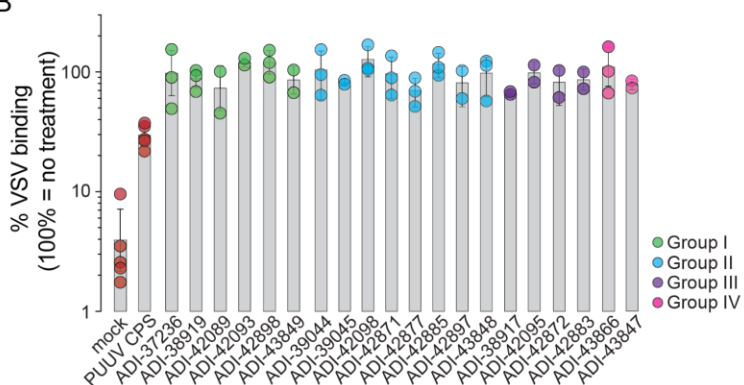

**Fig. S9: Mechanistic basis of mAb-dependent inhibition of virus infection.**

(A) Capacity of mAbs to block PUUV Gn/Gc-mediated fusion-infection. rVSV-PUUV-Gn/Gc particles were pre-incubated with decreasing amounts of indicated mAbs (50 nM to 0.005 nM), followed by fusion-infection of HUVECs. ADI-37219, a non-neutralizing mAb, was included as a negative control (also see

Fig. S8B). Data points are colored according to the mAb's competition group assignments defined in Fig. 3. Averages  $\pm$  SD,  $n=6-18$  from two to six experiments. **(B)** Capacity of mAbs to block attachment of virus particles to host cells. Pre-titrated amounts of rVSV-mNG-P-PUUV-Gn/Gc were incubated with mAbs at 25 nM (or PUUV convalescent patient serum (CPS) at a 1:100 dilution). Binding of rVSV:mAb complexes to U2OS cells was determined by flow cytometry. Data points are colored according to the mAb's competition group assignments defined in Fig. 3. Averages  $\pm$  SD,  $n =$  two to three experiments.

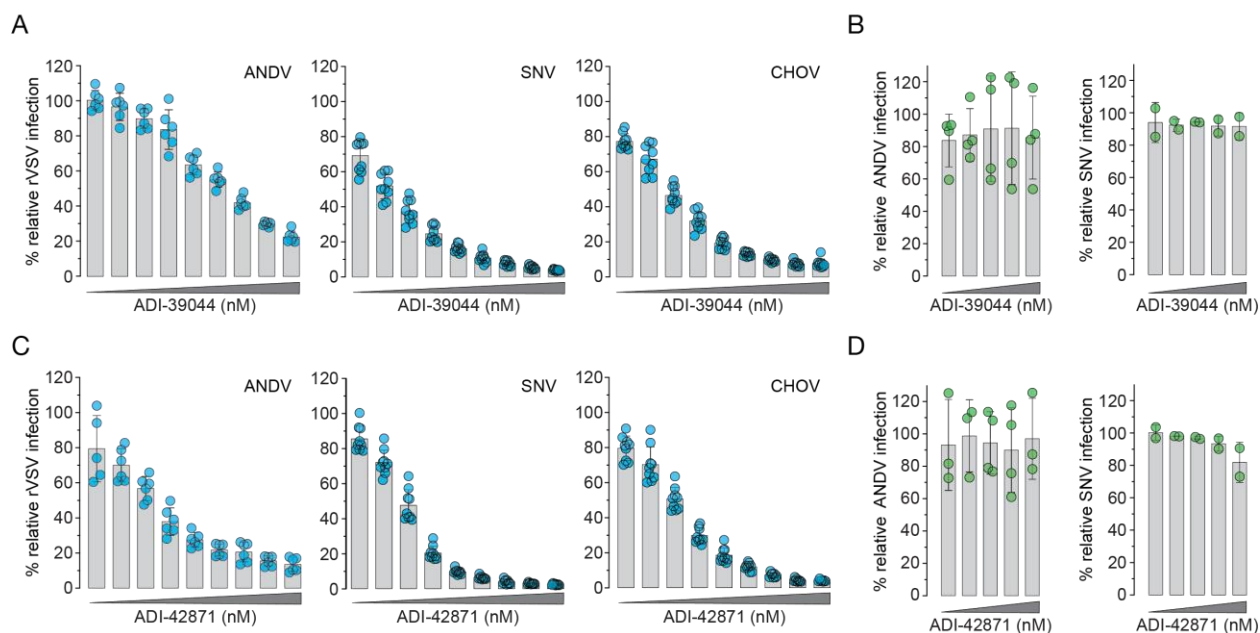

**Fig. S10: Activity of Group II mAbs against NWH Gn/Gc-mediated infection.**

(**A** and **C**) Capacity of Group II nAbs, ADI-39044 and ADI-42871 to block infection by rVSV-ANDV, -SNV and -CHOV-Gn/Gc on Vero cells. mAb dilution series started at 100 nM (ADI-39044, all three rVSVs), 40 nM (ADI-42871, rVSV-ANDV-Gn/Gc) or 10nM (ADI-42871, rVSV-SNV- and CHOV-Gn/Gc) followed by 3-fold dilutions. Averages  $\pm$  SD,  $n=6$  from two experiments. (**B** and **D**) Capacity of Group II nAbs, ADI-39044 and ADI-42871 to inhibit infection by authentic NWH, ANDV and SNV on HUVECs. mAb dilution series started at 100 nM followed by 5-fold dilutions. Averages  $\pm$  SD,  $n=2$  from one experiment (SNV), and  $n=4$  from two experiments (ANDV).



Fig S11

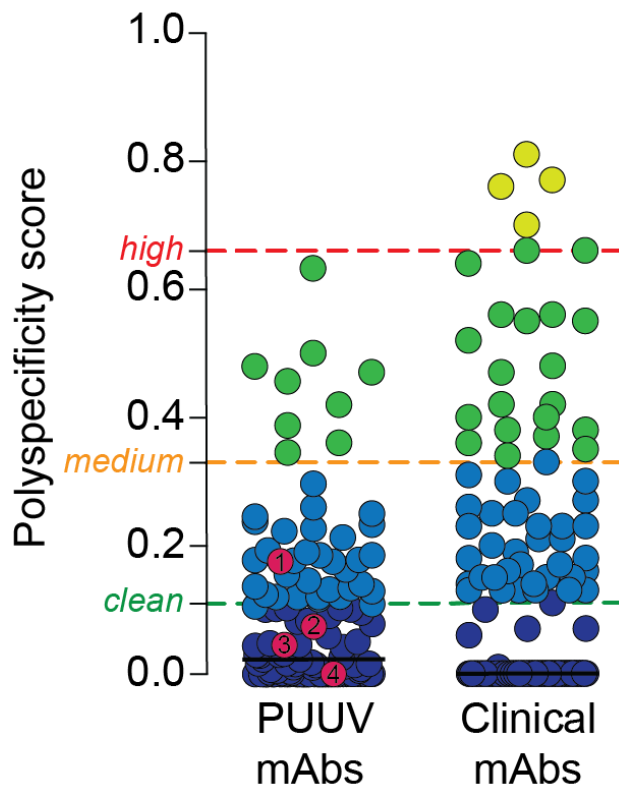

**Fig. S11: Polyreactivity of mAbs isolated from PUUV-experienced donors.**

Polyreactivity was determined using a previously described assay (39). Thresholds for high, medium, and low polyreactivity are indicated by dashed lines. Polyspecificity scores for 137 clinical stage mAbs are shown for comparison. Bar indicates median. mAbs tested in bank vole PUUV challenges are marked: 1 = ADI-42898; 2 = ADI-42877; 3 = ADI-38919; 4 = ADI-42098.

Table S1

A

| <b>Tree Label</b> | <b>Virus Name</b>       | <b>Strain/Isolate</b> | <b>GenBank #</b> |
|-------------------|-------------------------|-----------------------|------------------|
| ANDV              | Andes virus             | Chile-9717869         | MT956623.1       |
| BAYV              | Bayou virus             | HV F0260003           | GQ244521.1       |
| BCCV              | Black creek canal virus |                       | L39950.1         |
| CHOV              | Choclo virus            | 588                   | KT983772.1       |
| DOBV              | Dobrava-Belgrade virus  | Ano-Poroia/Af19       | NP_942554.1      |
| HTNV              | Hantaan virus           | 76-118                | Y00386.1         |
| LGNV              | Laguna Negra virus      | 510B                  | AF005728.1       |
| MPRLV             | Maporal virus           | HV-97021050           | NC_034552.1      |
| PHV               | Prospect Hill virus     | M3                    | X55129.1         |
| PUUV              | Puumala virus           | CG1820/POR            | ALI59825.1       |
| SEOV              | Seoul virus             | SR-11                 | M34882.1         |
| SNV               | Sin Nombre virus        | NM H10                | KT885045.1       |
| TULV              | Tula virus              | Moravia/5302v/95      | NC_005228.1      |

B

|              | <b>ANDV</b> | <b>SNV</b> | <b>CHOV</b> | <b>MPRLV</b> | <b>LGNV</b> | <b>BAYV</b> | <b>BCCV</b> | <b>PUUV</b> | <b>HTNV</b> | <b>SEOV</b> | <b>DOBV</b> | <b>TULV</b> |
|--------------|-------------|------------|-------------|--------------|-------------|-------------|-------------|-------------|-------------|-------------|-------------|-------------|
| <b>ANDV</b>  |             | 78         | 83          | 85           | 86          | 76          | 75          | 66          | 55          | 54          | 54          | 68          |
| <b>SNV</b>   | 78          |            | 78          | 77           | 77          | 80          | 80          | 67          | 55          | 53          | 54          | 69          |
| <b>CHOV</b>  | 83          | 78         |             | 83           | 82          | 77          | 76          | 65          | 54          | 53          | 55          | 66          |
| <b>MPRLV</b> | 85          | 77         | 83          |              | 81          | 75          | 74          | 65          | 55          | 53          | 54          | 67          |
| <b>LGNV</b>  | 86          | 77         | 82          | 81           |             | 75          | 76          | 65          | 55          | 54          | 54          | 67          |
| <b>BAYV</b>  | 76          | 80         | 77          | 75           | 75          |             | 89          | 65          | 55          | 54          | 54          | 68          |
| <b>BCCV</b>  | 75          | 80         | 76          | 74           | 76          | 89          |             | 66          | 55          | 53          | 53          | 68          |
| <b>PUUV</b>  | 66          | 67         | 65          | 65           | 65          | 65          | 66          |             | 53          | 54          | 53          | 79          |
| <b>HTNV</b>  | 55          | 55         | 54          | 55           | 55          | 55          | 55          | 53          |             | 77          | 77          | 55          |
| <b>SEOV</b>  | 54          | 53         | 53          | 53           | 54          | 54          | 53          | 54          | 77          |             | 77          | 54          |
| <b>DOBV</b>  | 54          | 54         | 55          | 54           | 54          | 54          | 53          | 53          | 77          | 77          |             | 55          |
| <b>TULV</b>  | 68          | 69         | 66          | 67           | 67          | 68          | 68          | 79          | 55          | 54          | 55          |             |

**Table S1: GPC amino acid sequence analyses related to Fig. 1A.**

(A) GPC amino acid sequences used for the construction of Fig. 1A. (B) Pairwise aa sequence comparison of orthohantavirus GPCs shown in (A) as given in % identity.

Table S2

A

|                                                    | PUUV patients (n=45)<br>mean (range) | Reference<br>interval |
|----------------------------------------------------|--------------------------------------|-----------------------|
| Age (years)                                        | 48 (18-75)                           |                       |
| Sex (male/female)                                  | 25/20 (56%/44%)                      |                       |
| C-reactive protein, max (mg/L)                     | 85 (16-214)                          | <3                    |
| Leukocyte count, max (10e9/L)                      | 10.7 (6.7-22.2)                      | 3.5-8.8               |
| Platelet count, min (10e9/L)                       | 82 (11-310)                          | 145-387               |
| S-creatinine, max ( $\mu\text{mol/L}$ )            | 404 (66-1548)                        | <90/<105*             |
| S-lactate dehydrogenase, max ( $\mu\text{kat/L}$ ) | 6 (1.1-11.8)                         | <3.4                  |
| PT INR, max                                        | 1.1 (0.9-2.3)                        | <1.2                  |
| APTT, max (secs)                                   | 31 (23.9-39.1)                       | 24.0-36.0             |
| P-albumin, min (g/L)                               | 31 (20-44)                           | 36-45                 |

B

|                                                    | B Cell Donor |      |      |      |      |      |
|----------------------------------------------------|--------------|------|------|------|------|------|
|                                                    | 1            | 2    | 3    | 4    | 5    | 6    |
| Sample #                                           | 185          | 214  | 227  | 243  | 249  | 928  |
| Age (years)                                        | 65           | 49   | 69   | 39   | 38   | 70   |
| Sex (male/female)                                  | F            | M    | F    | M    | F    | F    |
| Day after disease onset                            | 67           | 70   | 63   | 63   | 37   | 90   |
| <u>Laboratory findings</u>                         |              |      |      |      |      |      |
| C-reactive protein, max (mg/L)                     | 42           | 48   | 68   | 138  | 58   | 56   |
| Leukocyte count, max (10e9/L)                      | 10.1         | 9.5  | 11.5 | 14.3 | 15.2 | 7.8  |
| Platelet count, min (10e9/L)                       | 133          | 87   | 146  | 18   | 11   | 151  |
| S-creatinine, max ( $\mu\text{mol/L}$ )            | 94           | 886  | 192  | 769  | 178  | 403  |
| S-lactate dehydrogenase, max ( $\mu\text{kat/L}$ ) | 4.2          | 6.3  | 4.6  | 8.7  | 5.4  | 4.9  |
| PT INR, max                                        | 1.1          | 1.0  | 1.0  | 1.1  | 1.2  | 1.0  |
| APTT, max (secs)                                   | 28.3         | 28.7 | 26.6 | 38.5 | 31.2 | 27.5 |
| P-albumin, min (g/L)                               | N.D.         | 41   | 37   | 43   | 38   | 28   |

**Table S2: Demographic and laboratory characteristics of PUUV cohort donors during acute phase of disease.**

(A) PUUV patients displayed typical symptoms for HFRS such as acute onset of fever, myalgia, head and abdominal pain. Signs of thrombocytopenia and transient renal failure were frequent. The maximum or minimum values during the acute phase of the disease are presented. \*, reference values for females and males, respectively. (B) Table of metadata from six PUUV convalescent patients prioritized for isolation

of memory B cells reactive to hantaviral Gn/Gc. APTT, Activated Partial Thromboplastin Time; PT INR, Prothrombin Time - International Normalized Ratio. ND, not determined.
